# Supplementary material for: 3′aQTL-atlas: an atlas of 3′UTR alternative polyadenylation quantitative trait loci across human normal tissues
Source: PubMed Central journal article supplement — Nucleic Acids Res. 2021 Aug 25;50(D1):D39–45. doi: 10.1093/nar/gkab740 (PMC8728222; doi:10.1093/nar/gkab740), 2021-08-25
Supplement: gkab740_supplemental_file.pdf [file gkab740_supplemental_file.pdf]

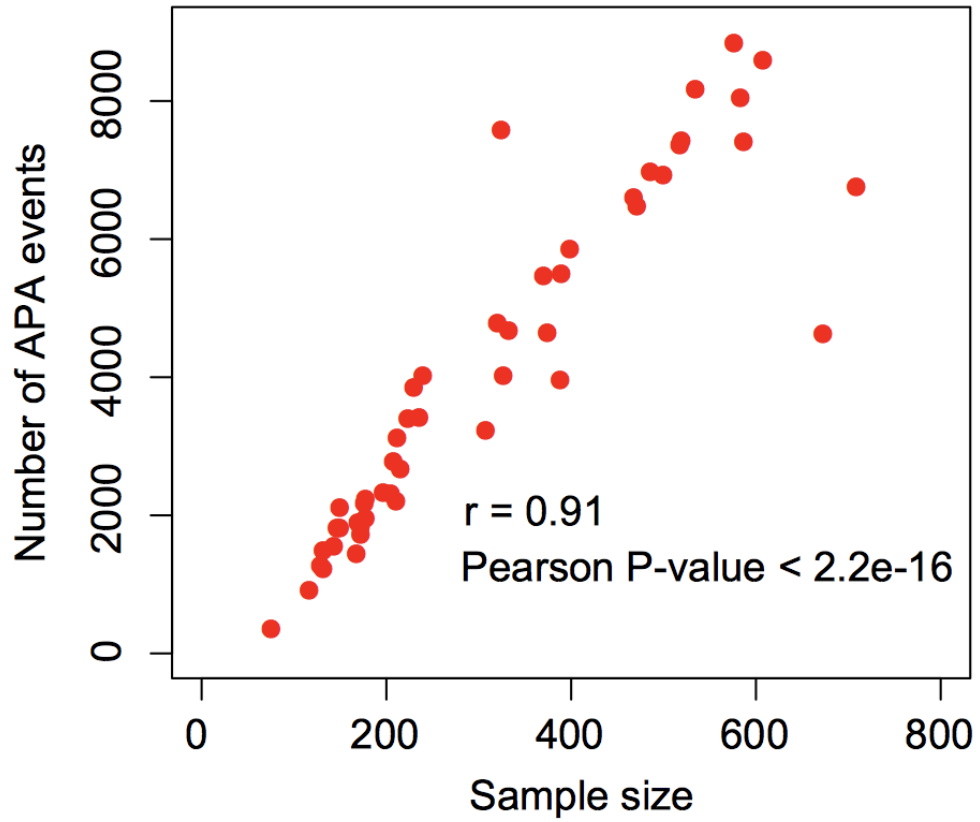

**Supplementary Figure S1.** The number of 3'aQTL APA events was highly correlated (Pearson correlation P-value  $< 2.2e-16$ ,  $r=0.91$ ) with the sample size in each tissue. Each dot indicates a tissue type.
